# Supplementary material for: Unveiling the ligand-mediated phase engineering mechanism in two-dimensional transition metal chalcogenides through coordination geometry control
Source: Royal Society of Chemistry journal article supplement (doi:10.1039/d4ta00326h), 2024-01-01
Supplement: d4ta00326h1.pdf [file d4ta00326h1.pdf]

## *Supplementary Information*

---

# **Unveiling Ligand-Mediated Phase Engineering Mechanism in Two-Dimensional Transition Metal Chalcogenides through Coordination Geometry Control**

Sungju Jun,<sup>[1]</sup> Joo-Won Lee,<sup>[1]</sup> Sung-Chul Kim,<sup>[2]</sup> Soong Ju Oh,<sup>[3]</sup> and Sohee Jeong\*<sup>[1]</sup>

[1] Materials Architecturing Research Center, Korea Institute of Science and Technology, Seoul, 02792, South Korea

[2] Advanced Analysis and Data Center, Korea Institute of Science and Technology, Seoul, 02792, South Korea

[3] Department of Materials Science and Engineering, Korea University, Seoul 02841, South Korea

## Experimental section

### Chemical

Tungsten hexacarbonyl ( $W(CO)_6$ , 97%, Sigma-Aldrich), trioctylphosphine oxide (TOPO, technical grade, 90%, Sigma-Aldrich), hexadecylamine (HDAm, technical grade, 90%, Sigma-Aldrich), triphenylphosphine oxide (TPPO, 98%, Sigma-Aldrich), selenium (Se, 99.99% trace metals basis, Sigma-Aldrich), sulfur (S, 99.98% trace metal basis, Sigma-Aldrich), toluene (>99.8%, SAMCHUN pure chemical), acetone (99.7%, SAMCHUN pure chemical), and ethanol (99.9%, SAMCHUN pure chemical) were used as received without further purification. Oleylamine (OLAm, technical grade, 70%, Sigma-Aldrich), and 1-octadecene (ODE, technical grade, 90%, Sigma-Aldrich) were used after purification.

### Synthesis of 1T'-WSe<sub>2</sub> nanosheets

For the synthesis of 1T'-WSe<sub>2</sub>:TOPO, 1.0 mmol of  $W(CO)_6$ , 1.6 mmol of Se, 20 mmol of TOPO, and 20 mL of ODE were loaded in a 3-neck flask. The mixture was heated up to 330 °C for 40 min under Ar protection and kept for 2 h. The reaction pot was quenched using acetone to room temperature. 1T'-WSe<sub>2</sub> nanosheets were collected by centrifugation at 7,000 rpm with acetone and washed several time with toluene and ethanol. Finally, 1T'-WSe<sub>2</sub> nanosheets were dried and stored in glove box. In the case of 1T'-WSe<sub>2</sub>:TPPO, the same synthetic procedure was adopted except the introduction of TPPO (20 mmol) for replacing TOPO.

### Synthesis of 2H-WSe<sub>2</sub> nanosheets

The synthesis of 2H-WSe<sub>2</sub> nanosheets was conducted via the same process as for 1T'-WSe<sub>2</sub>:TOPO except that TOPO was replaced by the ligands (80 mmol of OLAm for 2H:WSe<sub>2</sub>:OLAm and 80 mmol of HDAm for 2H:WSe<sub>2</sub>:HDAm).

### **Synthesis of 1T-WS<sub>2</sub> and 2H-WS<sub>2</sub> nanosheets**

The synthesis of 1T-WS<sub>2</sub>:TOPO and 2H-WS<sub>2</sub>:OLAm was performed via the same methods for 1T'-WSe<sub>2</sub>:TOPO and 2H-WSe<sub>2</sub>:OLAm, respectively, except that Se was replaced by S (1.6 mmol).

### **Synthesis of W precursor complexes (W(CO)<sub>6</sub>:OLAm-T and W(CO)<sub>6</sub>:TOPO-T)**

W(CO)<sub>6</sub> and OLAm were added to a 3-neck flask with the molar ratio of 1:8. The mixture was heated up to the target temperatures (T = 50, 100, 150, 200 °C). For the synthesis of W(CO)<sub>6</sub>:TOPO-T, W(CO)<sub>6</sub> and TOPO were reacted instead of OLAm at the same temperatures.

### **Selenization of W(CO)<sub>6</sub>:OLAm-200 and W(CO)<sub>6</sub>:TOPO-200**

For the selenization process, a Se solution was injected to each flask containing W(CO)<sub>6</sub>:OLAm-200 and W(CO)<sub>6</sub>:TOPO-200, respectively, where a Se solution was prepared by dissolving Se powders in ODE under Ar protection. The selenization process was conducted at 330 °C and maintained for from 10 to 60 min.

### **XANES measurement**

W L<sub>1</sub>-edge XANES measurements were conducted at the 1D KIST-PAL beamline in Pohang Accelerator Laboratory (PAL). W L<sub>1</sub> pre-edges and rising edges were fitted using the Athena program.

### **Electrochemical measurement**

For preparing catalyst inks, 10 mg of 2H-WSe<sub>2</sub>:OLAm and 1T'-WSe<sub>2</sub>:TOPO, respectively, 60 μL of Nafion-117, and 1 ml of ethanol were mixed together. Each catalyst ink was dropped onto glassy carbon electrode (GCE) with the 3 mm diameter to be a catalyst loading of 0.65 mg/cm<sup>2</sup>. Linear sweep voltammetry was carried out to obtain polarization curves of 2H-WSe<sub>2</sub>:OLAm and 1T'-WSe<sub>2</sub>:TOPO in a Ar-saturated 0.5 M H<sub>2</sub>SO<sub>4</sub> solution with a scan rate of 10 mV/s using a graphite electrode as the counter electrode and a saturated calomel (Hg/HgCl<sub>2</sub>)

in saturated KCl) as the reference electrode. To obtain double-layer capacitances of 2H-WSe<sub>2</sub>:OLAm and 1T'-WSe<sub>2</sub>:TOPO, cyclic voltammetry measurements were conducted at different scan rates from 20 mV/s to 120 mV/s. The chronopotentiometry result of 1T'-WSe<sub>2</sub>:TOPO was collected at the current density of -10 mA/cm<sup>2</sup> for exploring the long-term durability.

### **Characterization**

Atomic arrangements were investigated by transmission electron microscopy (TEM) and high-angle annular dark-field scanning transmission electron microscopy (HAADF-STEM). Powder X-ray diffraction (PXRD) patterns were measured using an Empyrean diffractometer (Malvern Panalytical) equipped with a Cu K-alpha radiation source. Raman spectra were recorded by a confocal Raman microscope (inVia Reflex, Renishaw) with the laser excitation wavelength of 532 nm. X-ray pair distribution function (XPDF) measurements were conducted using a PANalytical Empyrean multipurpose diffractometer equipped with Ag anode ( $\lambda = 0.5609 \text{ \AA}$ ), a focusing mirror and a GaliPIX3D detector with CdTe sensor. Fourier transform infrared (FTIR) transmittance were obtained using a Nicolet iS50 FTIR spectrometer (Thermo Fisher Scientific). X-ray photoelectron spectroscopy (XPS) results were obtained using PHI 5000 VersaProbe instrument to investigate the chemical states.

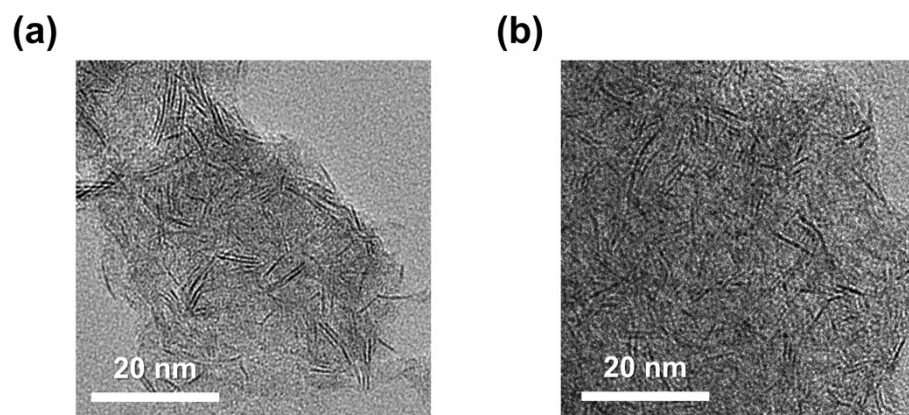

**Figure S1.** TEM images of (a) 2H-WSe<sub>2</sub>:OLAm and (b) 1T'-WSe<sub>2</sub>:TOPO.

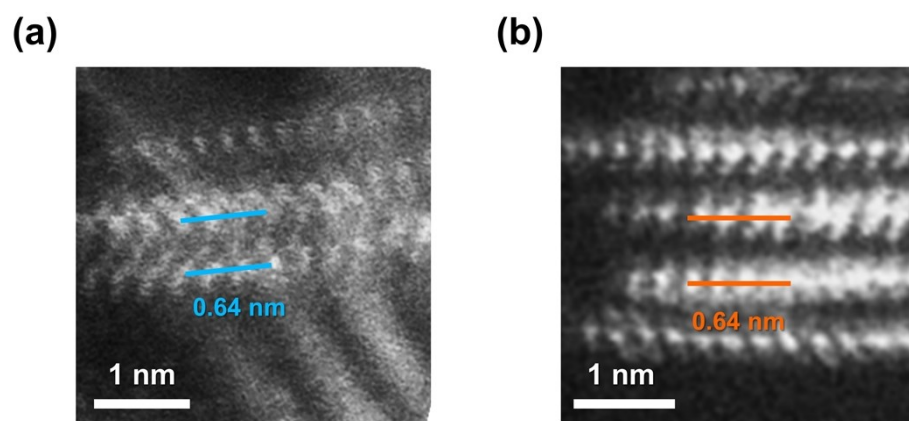

**Figure S2.** Side-view HAADF-STEM images of (a) 2H-WSe<sub>2</sub>:OLAm and (b) 1T'-WSe<sub>2</sub>:TOPO, showing their interlayer distances.

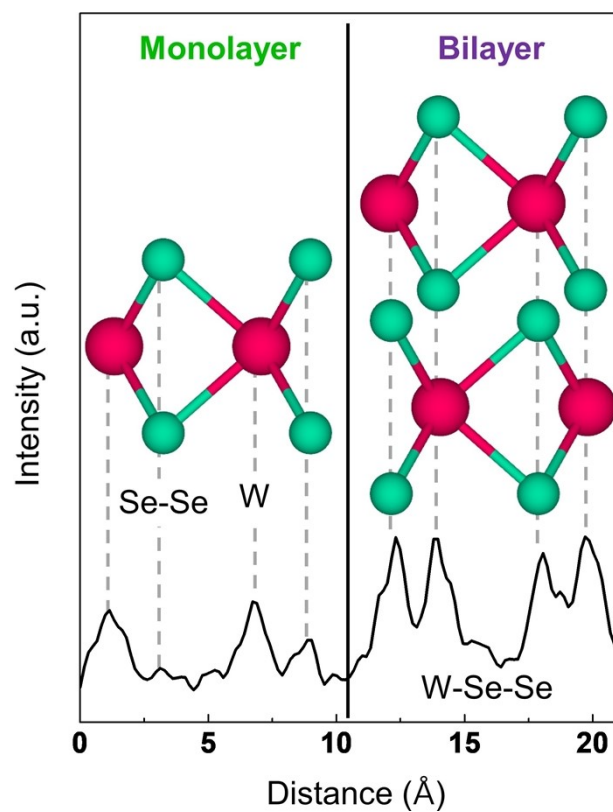

**Figure S3.** STEM intensity profile along the monolayer and bilayer region of 2H-WSe<sub>2</sub>:OLAm in Figure 1b. The intensity profile reflects the atomic sequences of monolayer 2H-WSe<sub>2</sub> (W and Se-Se) and bilayer 2H-WSe<sub>2</sub> (W-Se-Se) along the *c*-direction.

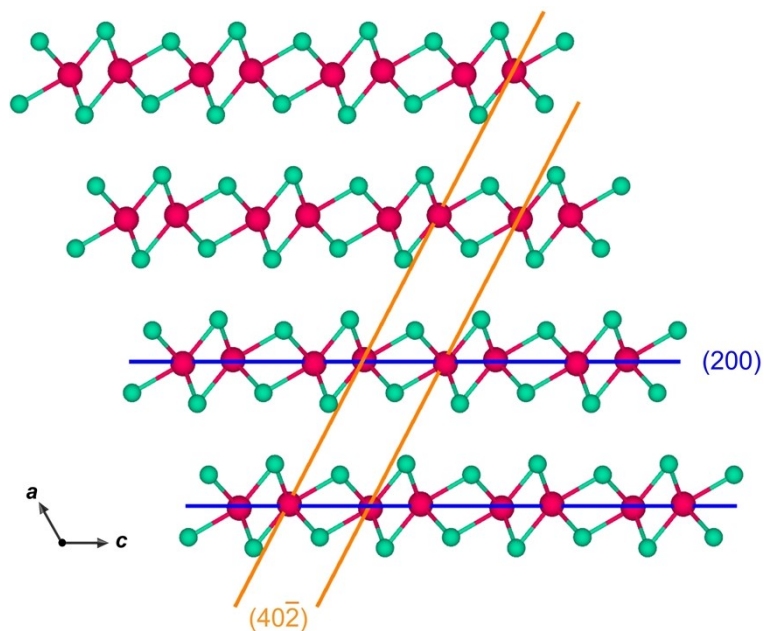

**Figure S4.** Schematic structure of 1T'-WSe<sub>2</sub> with (200) and (40-2) crystallographic planes highlighted.

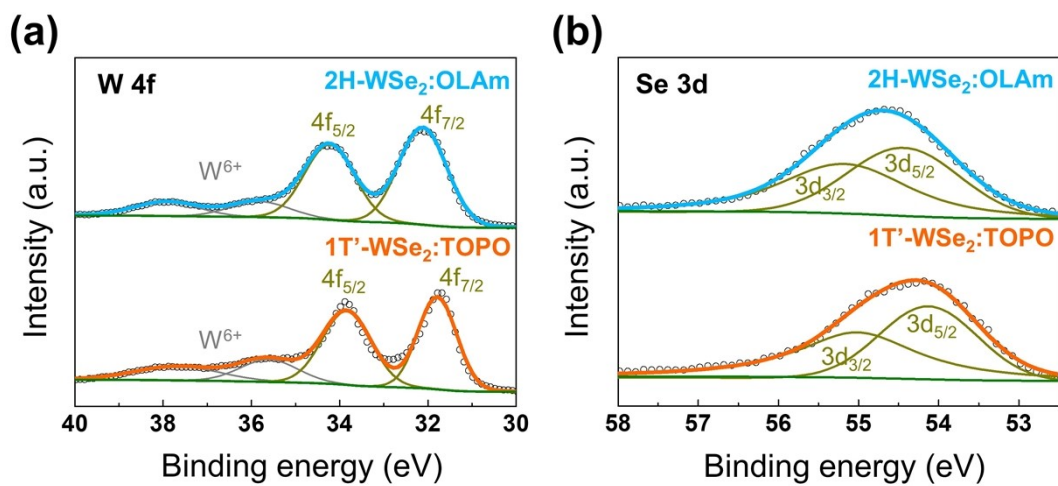

**Figure S5.** High-resolution XPS spectra of 2H-WSe<sub>2</sub>:OLAm and 1T'-WSe<sub>2</sub>:TOPO at the core level of (a) W 4f and (b) Se 3d.

**Table S1.** Calculated atomic-pair distances of 2H-WSe<sub>2</sub> and 1T'-WSe<sub>2</sub>.

| 2H-WSe <sub>2</sub>       |          | 1T'-WSe <sub>2</sub>      |          |
|---------------------------|----------|---------------------------|----------|
| Atomic pair               | Distance | Atomic pair               | Distance |
| W-Se(1)<br>(nearest pair) | 2.526 Å  | W-Se(1)<br>(nearest pair) | 2.493 Å  |
|                           |          |                           | 2.493 Å  |
|                           |          |                           | 2.514 Å  |
|                           |          |                           | 2.583 Å  |
|                           |          |                           | 2.583 Å  |
|                           |          |                           | 2.609 Å  |
| W-W                       | 3.282 Å  | W-W <sub>sh</sub>         | 2.777 Å  |
|                           |          | W-W <sub>b</sub>          | 3.265 Å  |
|                           |          | W-W <sub>el</sub>         | 3.979 Å  |
| W-Se(2)                   | 4.141 Å  | W-Se(2)                   | 3.825 Å  |
|                           |          |                           | 4.121 Å  |
|                           |          |                           | 4.180 Å  |

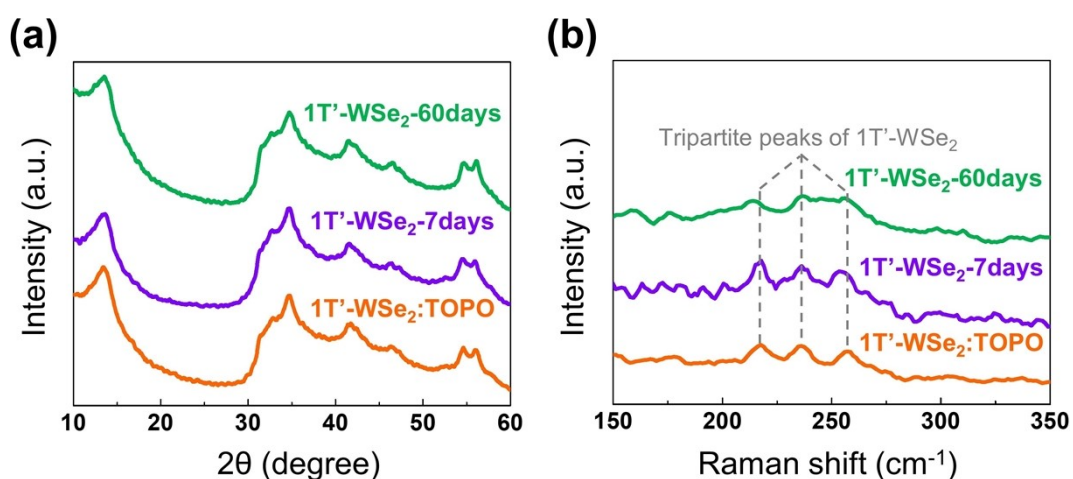

**Figure S6.** (a) XRD patterns and (b) Raman spectra of freshly prepared 1T'-WSe<sub>2</sub>:TOPO and 1T'-WSe<sub>2</sub>:TOPO that have been stored in ambient condition for 7 and 60 days (1T'-WSe<sub>2</sub>-7days and 1T'-WSe<sub>2</sub>-60days, respectively).



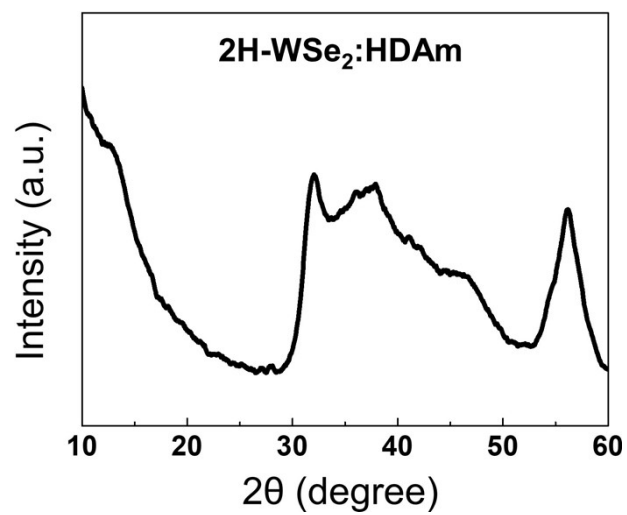

**Figure S7.** PXRD pattern of 2H-WSe<sub>2</sub> nanosheets grown by hexadecylamine (2H-WSe<sub>2</sub>:HDAm).

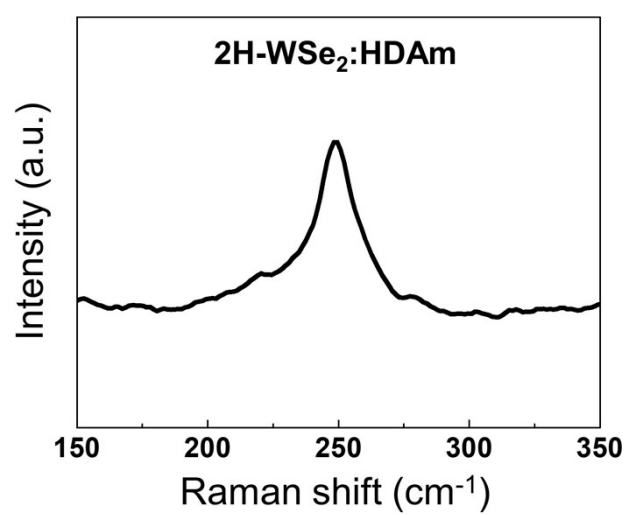

**Figure S8.** Raman spectrum of 2H-WSe<sub>2</sub>:HDAm.

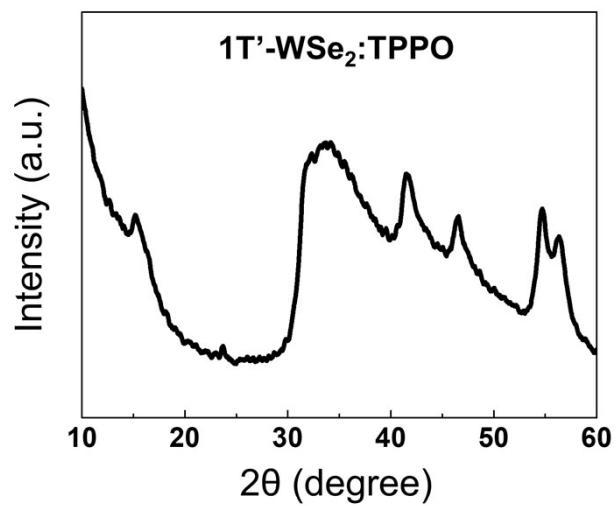

**Figure S9.** PXRD pattern of 1T'-WSe<sub>2</sub> nanosheets grown by triphenylphosphine oxide (1T'-WSe<sub>2</sub>:TPPO).

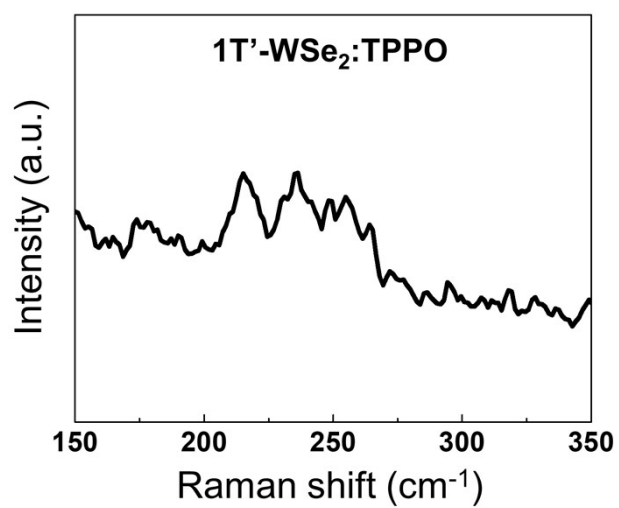

**Figure S10.** Raman spectrum of 1T'-WSe<sub>2</sub>:TPPO.

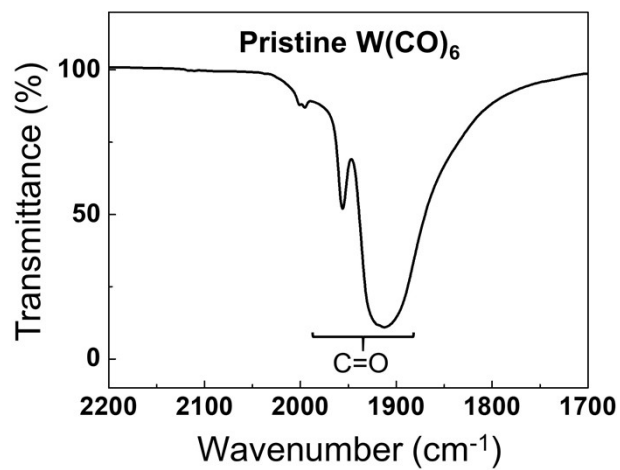

Figure S11. FTIR transmittance spectrum of pristine  $W(CO)_6$ , exhibiting C=O stretching signals.

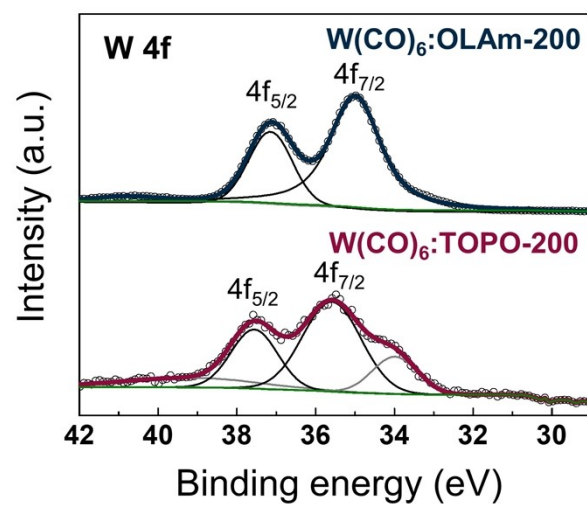

Figure S12. High-resolution W 4f XPS spectra of  $W(CO)_6:OLAm-200$  and  $W(CO)_6:TOPO-200$ .

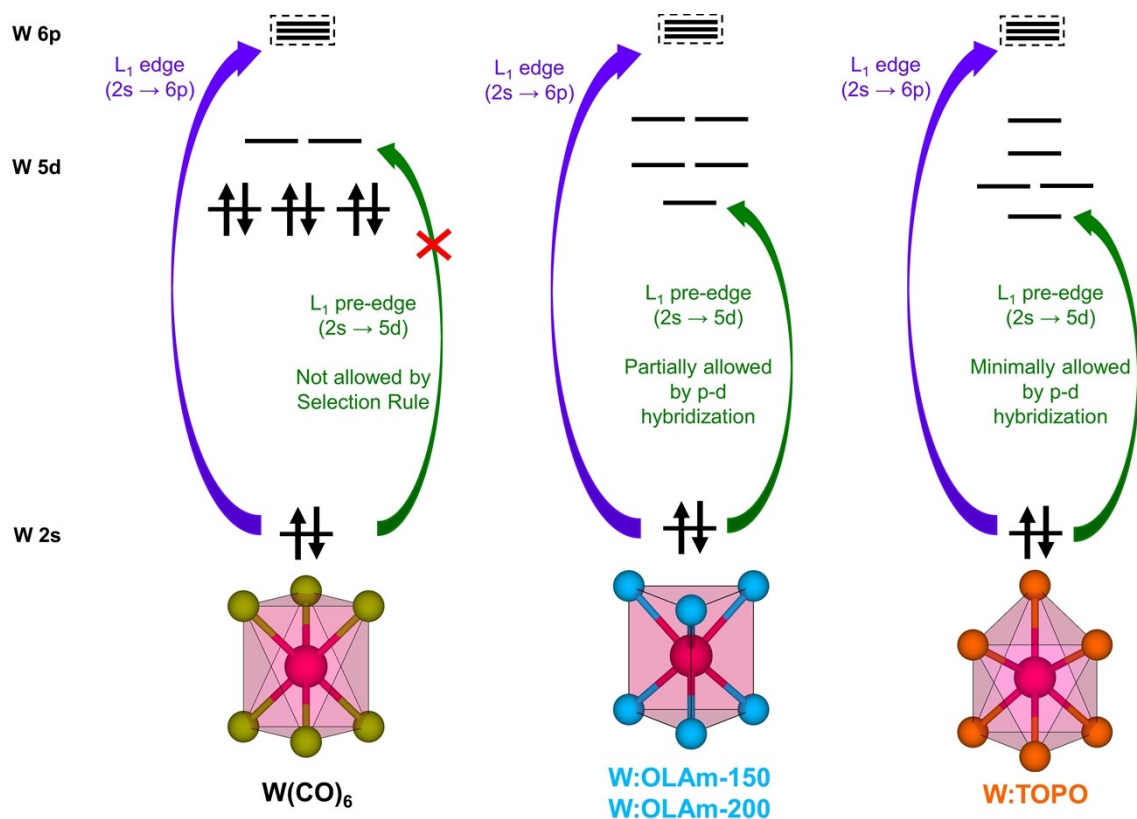

**Figure S13.** Schematic illustration describing a pre-edge absorption mechanism in six-coordinate W complexes.

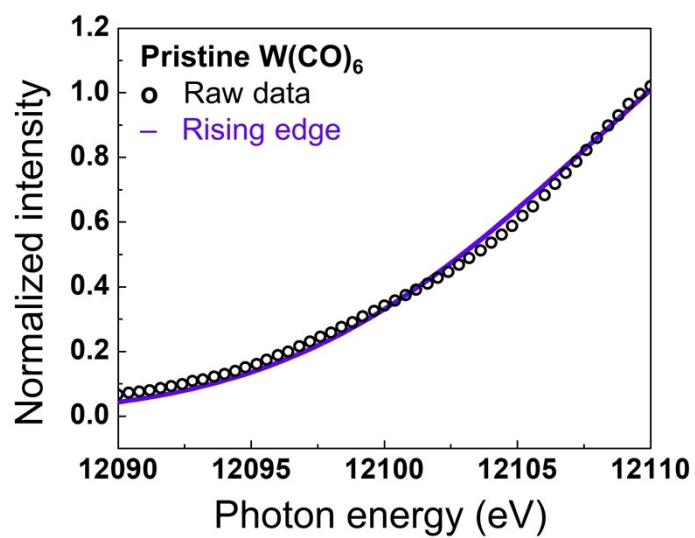

**Figure S14.** XANES spectrum of pristine  $W(CO)_6$  at the W  $L_1$ -edge, fitted with the rising edge.

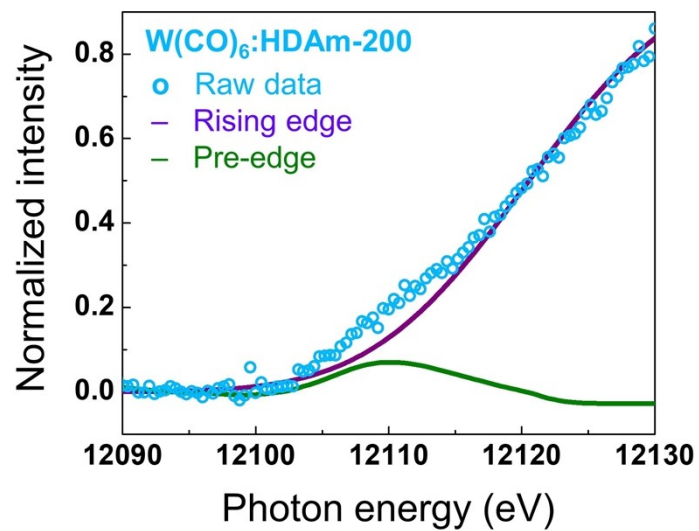

Figure S15. Fitted XANES spectrum of  $W(CO)_6:HDAm-200$  at the  $W L_1$ -edge.

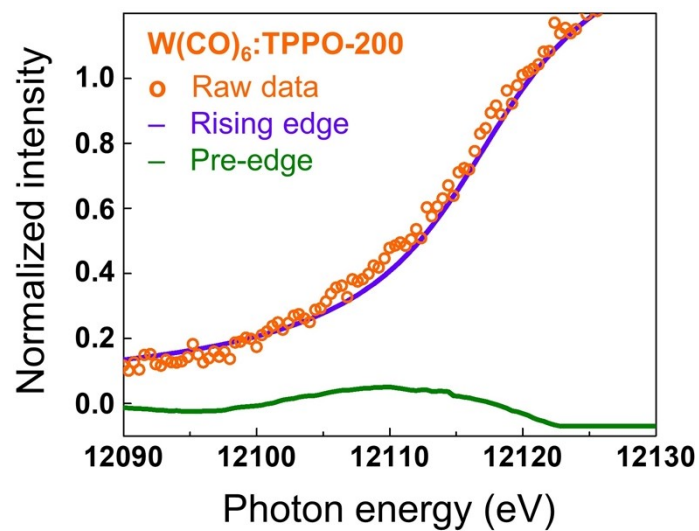

Figure S16. Fitted XANES spectrum of  $W(CO)_6:TPPO-200$  at the  $W L_1$ -edge.

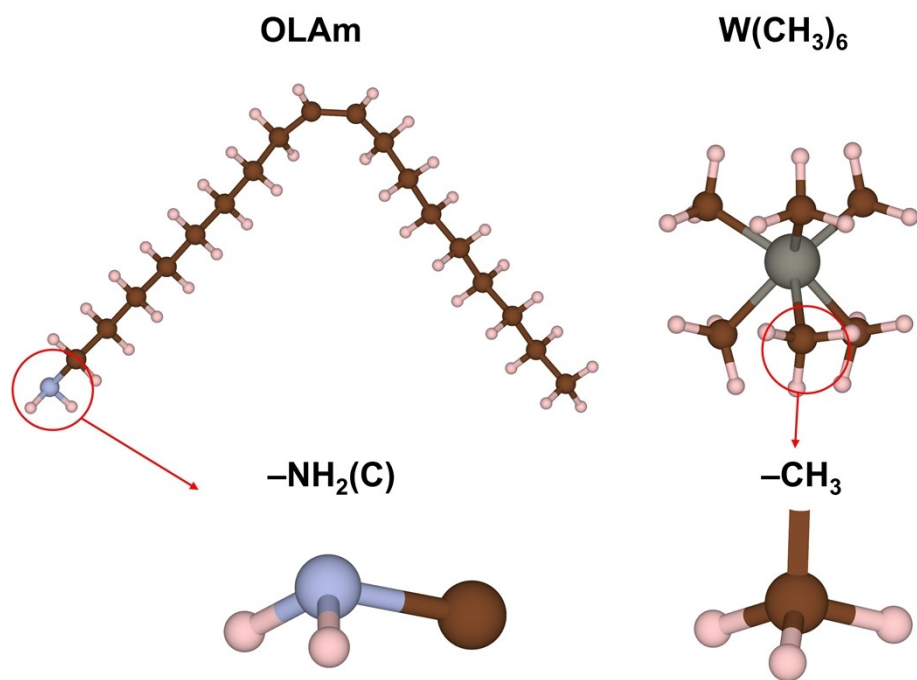

**Figure S17.** Tetrahedral molecular geometry of  $-NH_2(C)$  in OLAm and  $-CH_3$  in  $W(CH_3)_6$ .

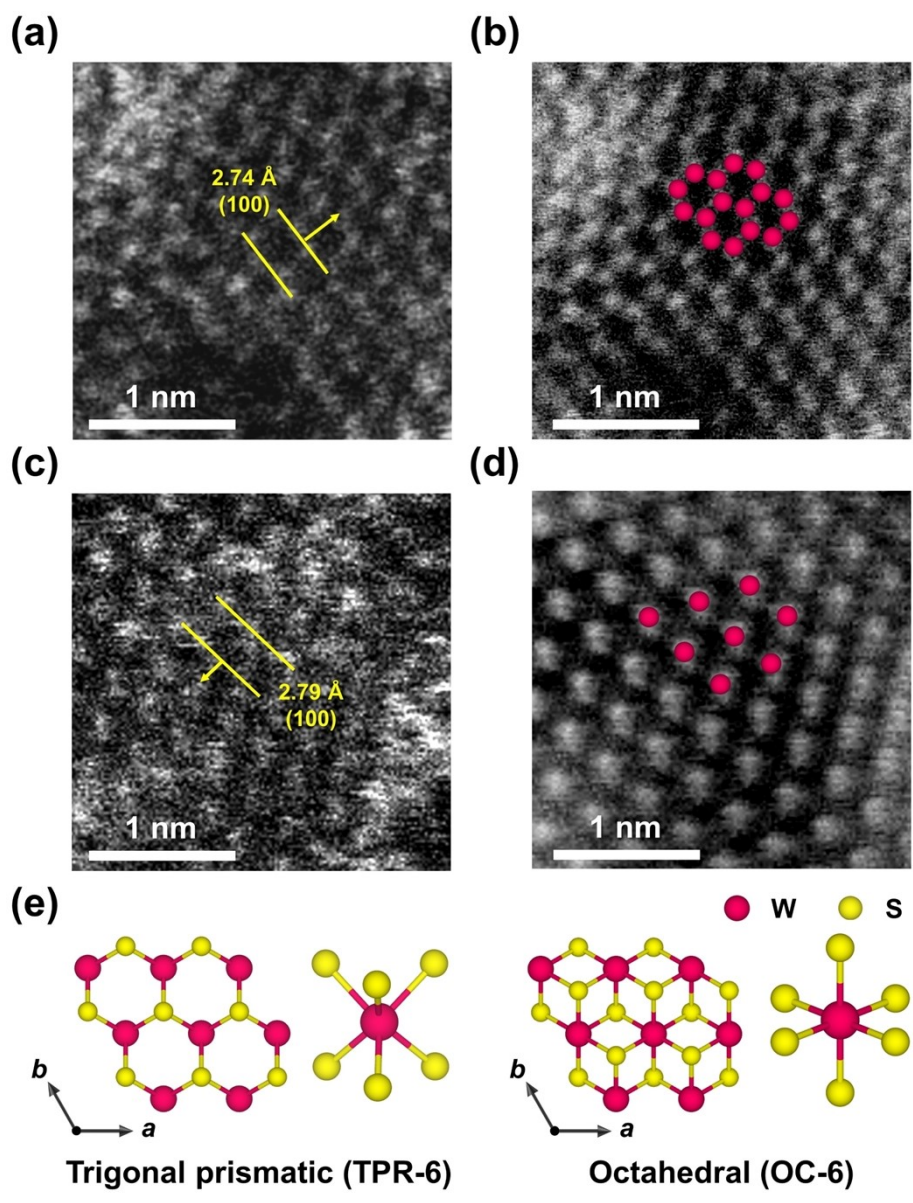

**Figure S18.** Top-view HAADF-STEM and inverse FFT images of (a,b) 2H-WS<sub>2</sub>:OLAm and (c,d) 1T-WS<sub>2</sub>:TOPO. (e) Schematic structures showing the top-view atomic arrangement and W coordination geometry in 1T-WS<sub>2</sub> and 2H-WS<sub>2</sub>.

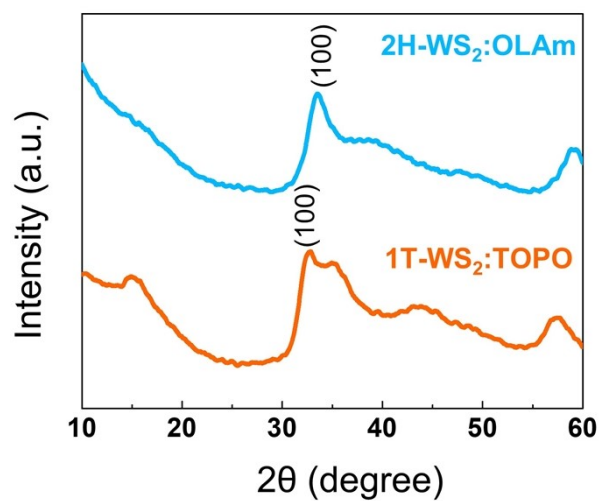

**Figure S19.** PXRD patterns of 2H-WS<sub>2</sub>:OLAm and 1T-WS<sub>2</sub>:TOPO.

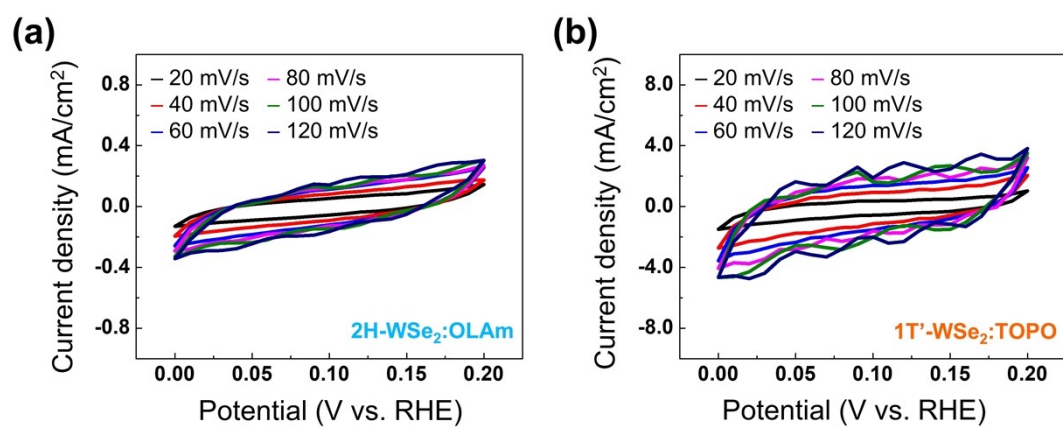

**Figure S20.** Cyclic voltammetry measurements of (a) 2H-WSe<sub>2</sub>:OLAm and (b) 1T'-WSe<sub>2</sub>:TOPO with varying scan rates.



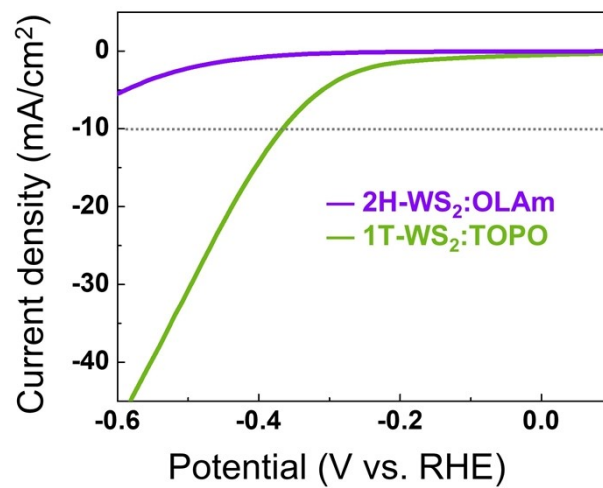

**Figure S21.** HER polarization curves of 2H-WS<sub>2</sub>:OLAm and 1T-WS<sub>2</sub>:TOPO.

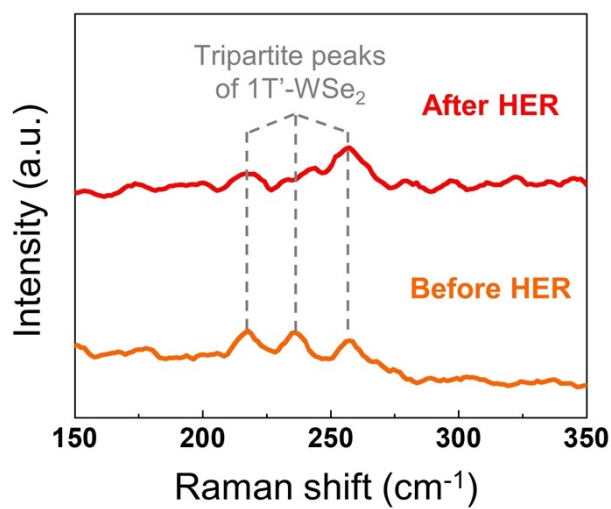

**Figure S22.** Raman spectrum of the 1T'-WSe<sub>2</sub>:TOPO catalyst before and after HER long-term stability measurement.

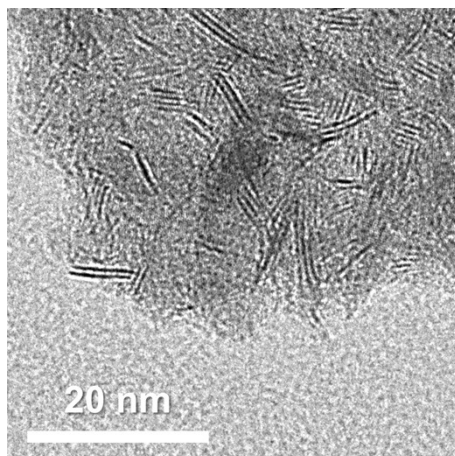

**Figure S23.** TEM image of the 1T'-WSe<sub>2</sub>:TOPO catalyst after long-term stability measurement.

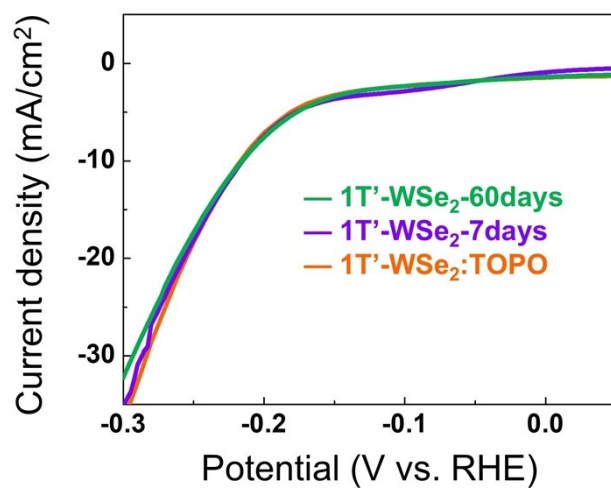

**Figure S24.** HER polarization curves of 1T'-WSe<sub>2</sub>:TOPO, 1T'-WSe<sub>2</sub>-7days, and 1T'-WSe<sub>2</sub>-60days.

**Table S2** HER performances of  $WCh_2$  catalysts in the literatures.

| Ref.      | Catalyst                                      | Overpotential (mV) | Tafel slope (mV/dec) | Stability      |
|-----------|-----------------------------------------------|--------------------|----------------------|----------------|
| 1         | Exfoliated 1T- $WS_2$                         | 250                | 60                   | 120 h          |
| 2         | 2M phase $WSe_2$                              | 104                | 71                   | 120 h          |
| 3         | $WS_2$ nanoribbons                            | 240                | 68                   | -              |
| 4         | $WS_2$ on $W_{18}O_{49}$ nanotubes            | 210                | 122                  | -              |
| 5         | 1T- $WSe_2$ on substrate by heating up method | 197                | 143                  | -              |
| 6         | Colloidal $WSe_2$ nanosheets                  | 140                | 101                  | 18 h           |
| 7         | $W_{0.8}Nb_{0.2}Se_2$                         | 125                | 69                   | 144 h          |
| 8         | 1T'- $WSe_2$ nano-monolayers                  | 232                | 59                   | -              |
| 9         | SLHS-1T- $WS_2$                               | 153                | 46                   | 36 h           |
|           | SLHS-1T- $WSe_2$                              | 211                | 58                   | -              |
| 10        | Colloidal 1T- $WS_2$                          | 200                | 50                   | 120 h          |
| 11        | Layered $WS_2$                                | 184                | 79                   | -              |
| 12        | 1T- $WS_2$ monolayer                          | 185                | 100                  | -              |
| 13        | $WSe_2$ nanostructure                         | 259                | 105                  | 3000 CV cycles |
| This work | 1T'- $WSe_2$ :TOPO                            | 210                | 115                  | 180 h          |

## References

- 1 D. Voiry, H. Yamaguchi, J. Li, R. Silva, D. C. B. Alves, T. Fujita, M. Chen, T. Asefa, V. B. Shenoy, G. Eda and M. Chhowalla, *Nat. Mater.*, 2013, **12**, 850-855.
- 2 I. S. Kwon, I. H. Kwak, J. Y. Kim, S. J. Lee, Q. A. Sial, J. Ihsan, K.-S. Lee, S. J. Yoo, J. Park and H. S. Kang, *Adv. Mater.*, 2023, 2307867.
- 3 J. Lin, Z. Peng, G. Wang, D. Zakhidov, E. Larios, M. J. Yacaman and J. M. Tour, *Adv. Energy Mater.*, 2014, **4**, 1301875.
- 4 X. Shi, M. Fields, J. Park, J. M. McEnaney, H. Yan, Y. Zhang, C. Tsai, T. F. Jaramillo, R. Sinclair, J. K. Nørskov and X. Zheng, *Energy Environ. Sci.*, 2018, **11**, 2270-2277.
- 5 Y. J. Park, H. S. So, H. Hwang, D. S. Jeong, H. J. Lee, L. Lim, C. G. Kim and H. S. Shin, *ACS Nano*, 2022, **16**, 11059-11065.
- 6 W. Zhang, X. Liu, T. Liu, T. Chen, X. Shen, T. Ding, L. Cao, L. Wang, Q. Luo and T. Yao, *J. Phys. Chem. C*, 2021, **125**, 6229-6236.
- 7 I. H. Kwak, I. S. Kwon, J. Y. Kim, G. M. Zewdie, S. J. Lee, S. J. Yoo, J.-G. Kim, J. Park and H. S. Kang, *ACS Nano*, 2022, **16**, 13949-13958.
- 8 Z. Liu, K. Nie, X. Qu, X. Li, B. Li, Y. Yuan, S. Chong, P. Liu, Y. Li, Z. Yin and W. Huang, *J. Am. Chem. Soc.*, 2022, **144**, 4863.
- 9 B. Li, K. Nie, Y. Zhang, L. Yi, Y. Yuan, S. Chong, Z. Liu and W. Huang, *Adv. Mater.*, 2023, **35**, 2303285.
- 10 Z. Liu, N. Li, C. Su, H. Zhao, L. Xu, Z. Yin, Li. J and Y. Du, *Nano Energy*, 2018, **50**, 176-181.

- 11 M. M. Alsabban, S. Min, M. N. Hedhili, J. Ming, L.-J. Li and K.-W. Huang, *ECS J. Solid State Sci. Technol.*, 2016, **5**, Q3067-Q3071.
- 12 A. Han, X. Zhou, X. Wang, S. Liu, Q. Xiong, Q. Zhang, L. Gu, Z. Zhuang, W. Zhang, F. Li, D. Wang, L. J. Li and Y. Li, *Nat. Commun.*, 2021, **12**, 709.
- 13 S. R. Kadam, A. N. Enyashin, L. Houben, R. Bar-Ziv and M. Bar-Sadan, *J. Mater. Chem. A*, 2020, **8**, 1403-1416.
